# Supplementary material
Source: PubMed Central journal article supplement (PMC7960398)
Supplement: 16-00819.pdf [file 16-00819.pdf]

**On-line Table 1: Image-acquisition settings (n = 20)**

| Parameter                                                   | T2                  | FLAIR               | SWAN <sup>a</sup>   | TIC <sup>b</sup>                                               |
|-------------------------------------------------------------|---------------------|---------------------|---------------------|----------------------------------------------------------------|
| Section orientation                                         | Axial               | Sagittal            | Axial               | Axial                                                          |
| Pulse sequence name                                         | FSE                 | 3D FSE              | 3D FGRE             | 3D FGRE                                                        |
| Time after T2 (hr:min:sec)                                  | 00:00:00            | 00:16:43 ± 00:03:30 | 00:29:16 ± 00:07:52 | 01:12:02 ± 00:09:45                                            |
| TR (ms)                                                     | 5800                | 7000                | 46                  | 5.724–8.208                                                    |
| TE (ms)                                                     | 76.512–80.832       | 123.211–131.379     | 23.06–23.50         | 1.736–2.1                                                      |
| TI (ms)                                                     | NA                  | 2060–2072           | NA                  | NA                                                             |
| FA                                                          | 90°–125°            | 90°                 | 15°                 | 20°                                                            |
| FOV (cm)                                                    | 19.6–23.8           | 23.04–25.6          | 20                  | 19.2–22.4                                                      |
| Matrix                                                      | 352 × 224           | 256 × 256           | 320 × 224           | 352 × 224                                                      |
| BW (kHz)                                                    | 162.773             | 122.07              | 244.141             | 195.312                                                        |
| Voxel size (mm)                                             | 0.5469 × 0.5469 × 2 | 0.5 × 0.5 × 1       | 0.3906 × 0.3906 × 1 | 0.4688 × 0.4688 ×<br>3.5 to 0.5469 × 0.5469 × 1.8 <sup>c</sup> |
| Image resolution (mm)<br>(root mean square/<br>Pythagorean) | 1.2380/2.1443       | 0.7071/1.2247       | 0.6596/1.1424       | 2.0567–1.1311/3.5622–1.9591                                    |
| ETL                                                         | 8                   | 140                 | 6                   | 1                                                              |
| Phase FOV (%)                                               | 70–85               | 100                 | 100                 | 80                                                             |
| Sampling (%)                                                | 100                 | 100                 | 69.1964–69.7891     | 100                                                            |
| Acquisition time (min:sec)                                  | 4:50                | 8:55                | 3:48                | 2:44                                                           |

**Note:**—FGRE indicates fast gradient-recalled echo; BW, bandwidth; ETL, echo-train length; FA, flip angle.

<sup>a</sup> Seventeen of 20 SWAN volumes had smaller superior/inferior head coverage (68 mm) that did not include the entire brain.

<sup>b</sup> Obtained after 0.1 mmol/kg of either gadopentetate dimeglumine or gadobutrol (Magnevist or Gadavist, respectively) at 5 mL/s, followed by 30 mL of saline at 5 mL/s. Because 2 separate contrast doses were needed for the scanning session, the total dosage was 20 mL of Magnevist or Gadavist and 60 mL saline.

<sup>c</sup> Nineteen of 20 TIC image volumes had a 0.5469 × 0.5469 × 1.8 mm voxel resolution.

**On-line Table 2: Fiducial landmark site location descriptions<sup>a</sup>**

| LM No. | Name of Site                  | Anatomic Description                          | X <sup>b</sup> (mm) | Y <sup>b</sup> (mm) | Z <sup>b</sup> (mm) |
|--------|-------------------------------|-----------------------------------------------|---------------------|---------------------|---------------------|
| 1      | R. midbrain vessel            | Perimesencephalic region vessel               | 19.93 ± 7.63        | -38.06 ± 18.98      | -6.15 ± 7.04        |
| 2      | L. midbrain vessel            | Perimesencephalic region vessel               | -22.31 ± 7.06       | -37.20 ± 16.61      | -7.88 ± 6.27        |
| 3      | R. MCA bifurcation            | MCA bifurcation                               | 33.89 ± 5.29        | 6.06 ± 5.62         | -9.37 ± 7.08        |
| 4      | L. MCA bifurcation            | MCA bifurcation                               | -36.05 ± 6.66       | 4.06 ± 7.30         | -8.92 ± 7.87        |
| 5      | R. TSV-septal junction region | Venous angle                                  | 1.00 ± 2.40         | -11.26 ± 5.99       | 13.42 ± 5.46        |
| 6      | L. TSV-septal junction region | Venous angle                                  | -2.50 ± 2.32        | -10.45 ± 3.92       | 12.94 ± 5.58        |
| 7      | Vein of Galen                 | Top of straight sinus                         | -4.29 ± 6.52        | -49.56 ± 7.46       | 13.49 ± 6.59        |
| 8      | R. posterior midlevel         | Posterior Sylvian vessel                      | 43.76 ± 8.85        | -37.18 ± 18.62      | 16.13 ± 7.22        |
| 9      | R. anterior midlevel          | Anterior Sylvian vessel                       | 36.53 ± 5.21        | 18.24 ± 7.65        | 11.84 ± 8.78        |
| 10     | L. posterior midlevel         | Posterior Sylvian vessel                      | -43.01 ± 7.75       | -32.08 ± 13.17      | 18.40 ± 7.42        |
| 11     | L. anterior midlevel          | Anterior Sylvian vessel                       | -36.49 ± 6.03       | 15.81 ± 10.62       | 9.57 ± 7.81         |
| 12     | Superior midline              | Superior interhemispheric sulci region vessel | -1.53 ± 9.08        | -15.01 ± 27.62      | 37.80 ± 8.53        |
| 13     | Far anterior                  | Anterior, midaxial region vessel              | -0.87 ± 6.77        | 50.97 ± 10.52       | 8.88 ± 10.12        |
| 14     | Posterior/inferior            | Torcular region inflow vessel                 | -4.49 ± 11.15       | -84.67 ± 8.92       | -14.71 ± 4.93       |
| 15     | Falx cerebri region           | Superior sagittal sinus region inflow vessel  | -0.53 ± 4.87        | -14.62 ± 18.52      | 68.57 ± 7.10        |

**Note:**—L. indicates left; R., right; TSV, trans-septal vein.

<sup>a</sup> Refer to Fig 1 for graphic descriptions.

<sup>b</sup> Right Anterior Superior (RAS) coordinate system (positive axes to R, A, and S) with the anterior commissure as the origin, based on the International Consortium for Brain Mapping 152 Nonlinear Symmetric 2009b template of the Montreal Neurological Institute (<http://www.bic.mni.mcgill.ca/ServicesAtlases/ICBM152Nlin2009>; n = 20 for each landmark).

**On-line Table 3: Target-to-registration error and Euclidean effectiveness ratio values for each registration and sequence (n = 20)<sup>a</sup>**

| Registration Experiment | FLAIR                      |                    | SWAN                       |                    | TIC                        |                    |
|-------------------------|----------------------------|--------------------|----------------------------|--------------------|----------------------------|--------------------|
|                         | TRE (mm)                   | EER                | TRE (mm)                   | EER                | TRE (mm)                   | EER                |
| Pre                     | 2.07 ± 0.55                | 1.000              | 2.63 ± 0.62 <sub>b</sub>   | 1.000              | 3.65 ± 2.00                | 1.000              |
| GE                      | 1.74 ± 0.33                | 0.672              | 1.46 ± 0.26 <sub>b</sub>   | 0.259              | 1.06 ± 0.16 <sup>c,f</sup> | 0.096 <sup>f</sup> |
| Rigid CC                | 1.62 ± 0.42 <sup>b</sup>   | 0.556              | 1.75 ± 0.67 <sup>b</sup>   | 0.440              | 2.39 ± 1.98                | 0.560              |
| Rigid MI                | 1.55 ± 0.46 <sup>b,f</sup> | 0.493 <sup>f</sup> | 1.55 ± 0.39 <sup>d</sup>   | 0.313              | 1.95 ± 1.15                | 0.406              |
| Affine CC               | 1.72 ± 0.46                | 0.653              | 1.57 ± 0.43 <sup>b</sup>   | 0.323              | 1.27 ± 0.35 <sup>b</sup>   | 0.170              |
| Affine MI               | 1.82 ± 0.62                | 0.757              | 1.34 ± 0.23 <sup>c,f</sup> | 0.181 <sup>f</sup> | 1.07 ± 0.14 <sup>e</sup>   | 0.100              |
| Rigid LM                | 1.15 ± 0.26 <sup>c</sup>   | 0.107              | 1.17 ± 0.24 <sup>c</sup>   | 0.068              | 0.86 ± 0.13 <sup>c</sup>   | 0.025              |
| Affine LM               | 1.04 ± 0.24 <sup>c</sup>   | 0.000              | 1.06 ± 0.26 <sup>c</sup>   | 0.000              | 0.79 ± 0.14 <sup>c</sup>   | 0.000              |

**Note:**—Pre indicates preregistration. FLAIR: Dunnett test; SWAN, TIC: Dunn test.

<sup>a</sup> Footnotes b–e indicate statistically significant TRE differences from preregistration values.

<sup>b</sup>  $P \leq .05$ .

<sup>c</sup>  $P \leq .0001$ .

<sup>d</sup>  $P \leq .01$ .

<sup>e</sup>  $P \leq .001$ .

<sup>f</sup> The best-performing registration for that sequence and metric.

**On-line Table 4: Statistical effectiveness ratio values for each registration and sequence, using patient-averaged data (n = 20)**

| Registration Experiment | FLAIR              | SWAN               | TIC                |
|-------------------------|--------------------|--------------------|--------------------|
| Pre                     | 1.000              | 1.000              | 1.000              |
| GE                      | 0.980              | 0.475              | 0.929              |
| Rigid CC                | 0.693              | 0.412              | 0.565 <sup>a</sup> |
| Rigid MI                | 0.573 <sup>a</sup> | 0.450              | 0.704              |
| Affine CC               | 0.758              | 0.435              | 0.903              |
| Affine MI               | 0.680              | 0.352 <sup>a</sup> | 1.007              |
| Rigid LM                | 0.183              | 0.130              | 0.260              |
| Affine LM               | 0.000              | 0.000              | 0.000              |

<sup>a</sup> Best-performing registration for that sequence.

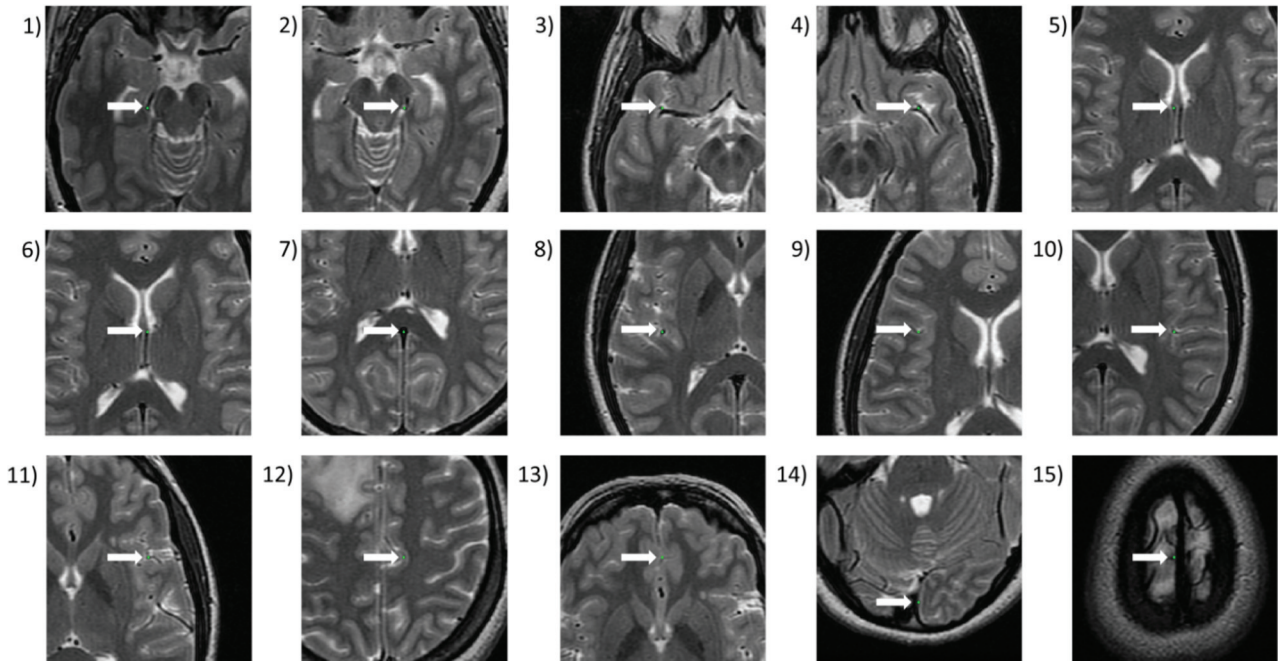

**ON-LINE FIG 1.** Axial T2-weighted views of fiducial landmark locations in a single patient, indicated by *green dots* with *white arrows*.

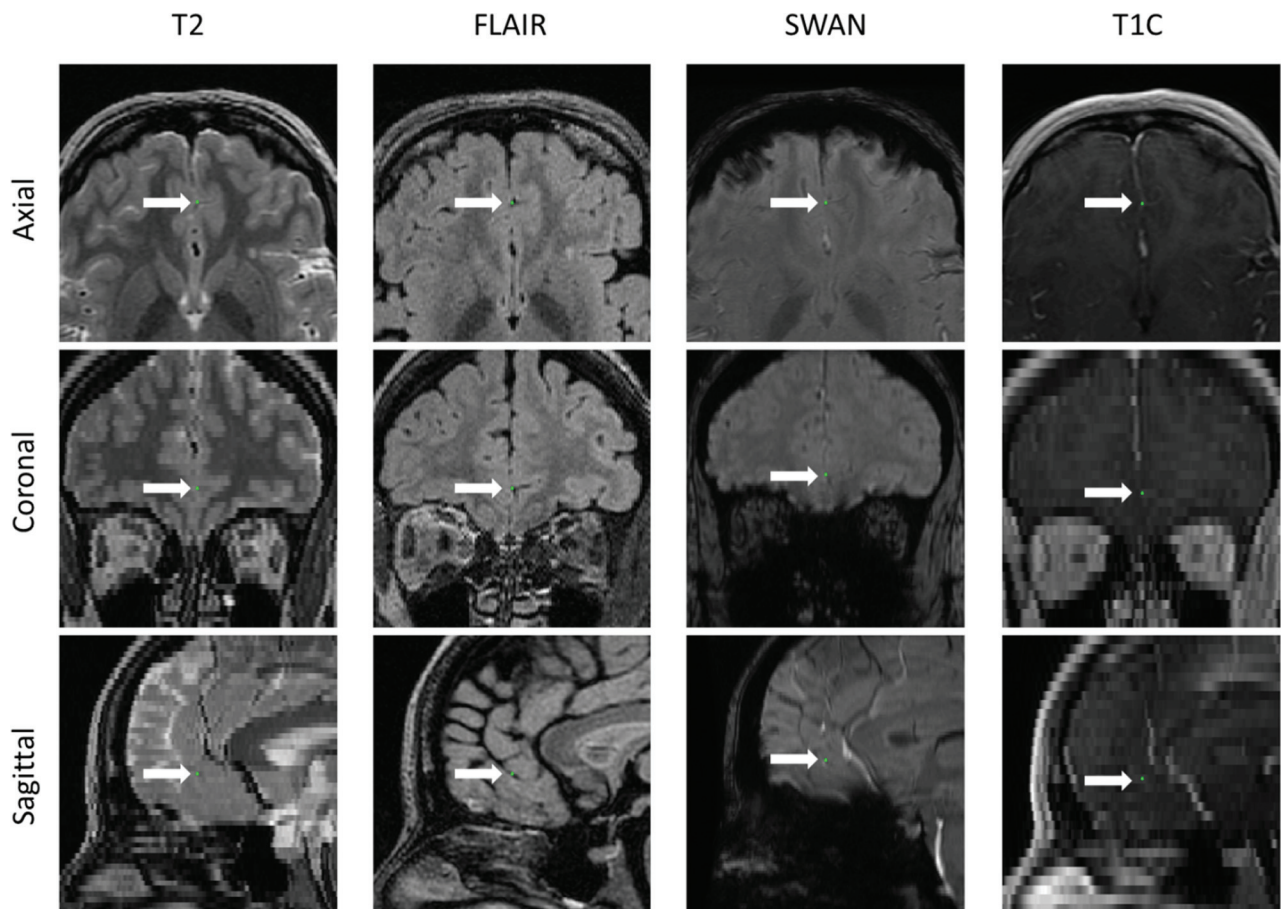

**ON-LINE FIG 2.** Fiducial landmark site 13 in 3-plane views for T2, FLAIR, SWAN, and TIC sequences, indicated by *green dots* with *white arrows*.

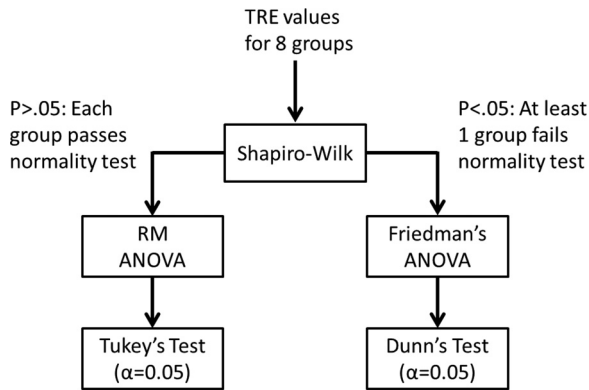

**ON-LINE FIG 3.** Statistical testing flowchart for target-to-registration error results for a single sequence. RM ANOVA indicates repeated measures ANOVA.

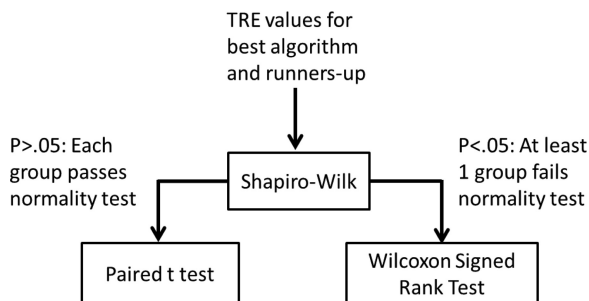

**ON-LINE FIG 4.** Statistical testing flowchart for TRE pair-wise comparisons of a sequence's best-performing algorithm and its runners-up.

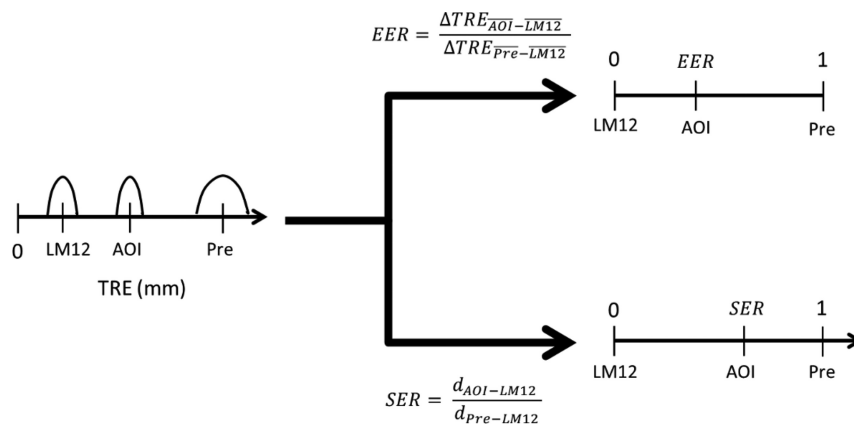

**ON-LINE FIG 5.** Conversion of target-to-registration error to the Euclidean effectiveness ratio and statistical effectiveness ratio for an AOI. LM12 indicates affine LM registration; Pre, pre-registration.

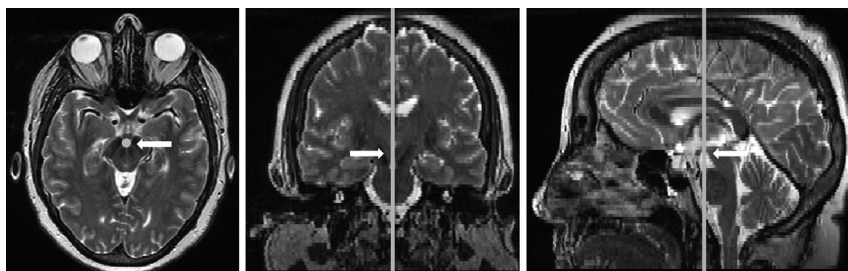

**ON-LINE FIG 6.** User-defined fulcrum point (white arrows) along a rotational axis in line with the dens. TRE behavior was analyzed on the basis of the Euclidean distance from this point.

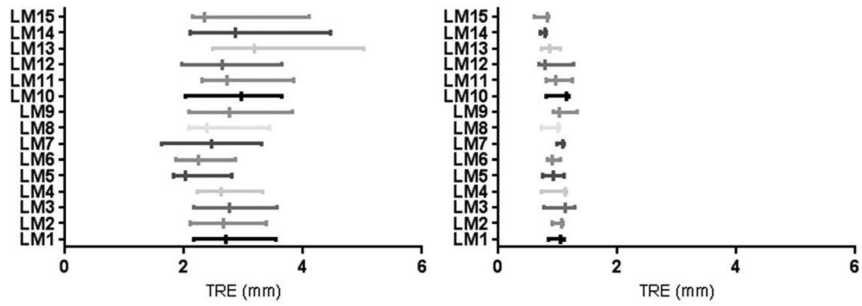

**ON-LINE FIG 7.** Baseline (*left*) and affine LM (*right*) TRE values for different landmark sites, averaged for FLAIR, SWAN, and TIC ( $n = 20$ ).

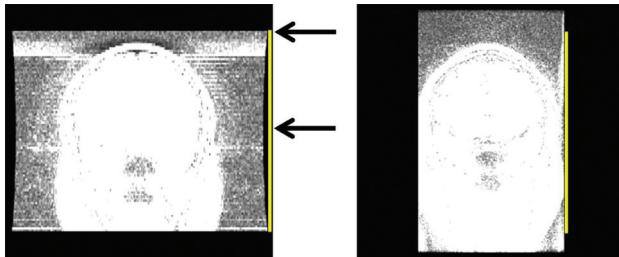

**ON-LINE FIG 8.** Coronal views of a native axial T2 sequence (*left*) and a native sagittal FLAIR sequence (*right*). Intensity windows have been leveled to make the acquisition edges visible. Left/right distortion correction has been applied to the left T2 image (note the side curvature that flares out at the top and bottom) but not the right FLAIR image. The lack of such correction makes anatomy on the FLAIR images appear smaller along the left/right axis, especially closer to the superior/inferior edges of the image volume, away from the iso-center where the magnetic gradients are weaker.
